# Supplementary material for: Optogenetic targeting of AII amacrine cells restores retinal computations performed by the inner retina
Source: PubMed Central journal article supplement — Mol Ther Methods Clin Dev. 2023 Sep 13;31:101107. doi: 10.1016/j.omtm.2023.09.003 (PMC10589896; doi:10.1016/j.omtm.2023.09.003), 2023-09-13
Supplement: mmc1.pdf [file mmc1.pdf]

**OMTM, Volume 31**

**Supplemental information**

**Optogenetic targeting of All amacrine  
cells restores retinal computations  
performed by the inner retina**

**Hanen Khabou, Elaine Orendorff, Francesco Trapani, Marco Rucli, Melissa  
Desrosiers, Pierre Yger, Deniz Dalkara, and Olivier Marre**

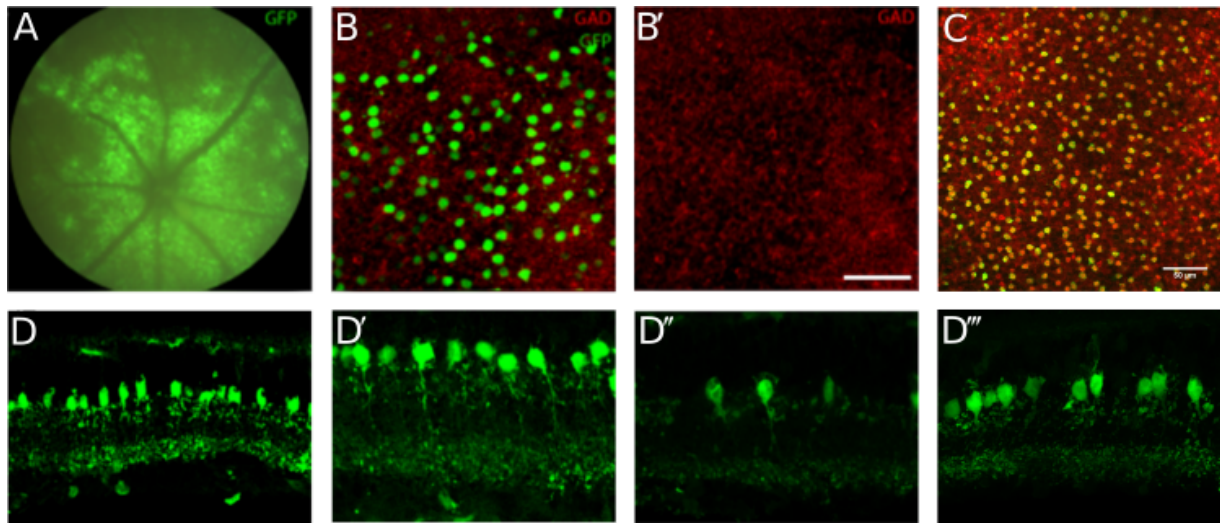

**Figure S1: Investigation of expression pattern upon intravitreal delivery of AAV2-7m8-HKamac-eGFP.**

**A.** Representative eye fundus image of a wild type mouse eye treated with AAV2-7m8-HKamac/GNAT2-GFP. **B, B'.** Post mortem retinal flat mount with endogenous eGFP fluorescence and immunostaining against GAD to visualize GABAergic cells. Scale bar is 50um. **C.** Whole mount view of the co-localization of Prox1 (red) and GFP (green). Scale bar is 50um. **D, D', D'', D'''**: Retinal cryosections showing eGFP expression (green). D''' shows the lobular appendages at the end of the dendritic processes.

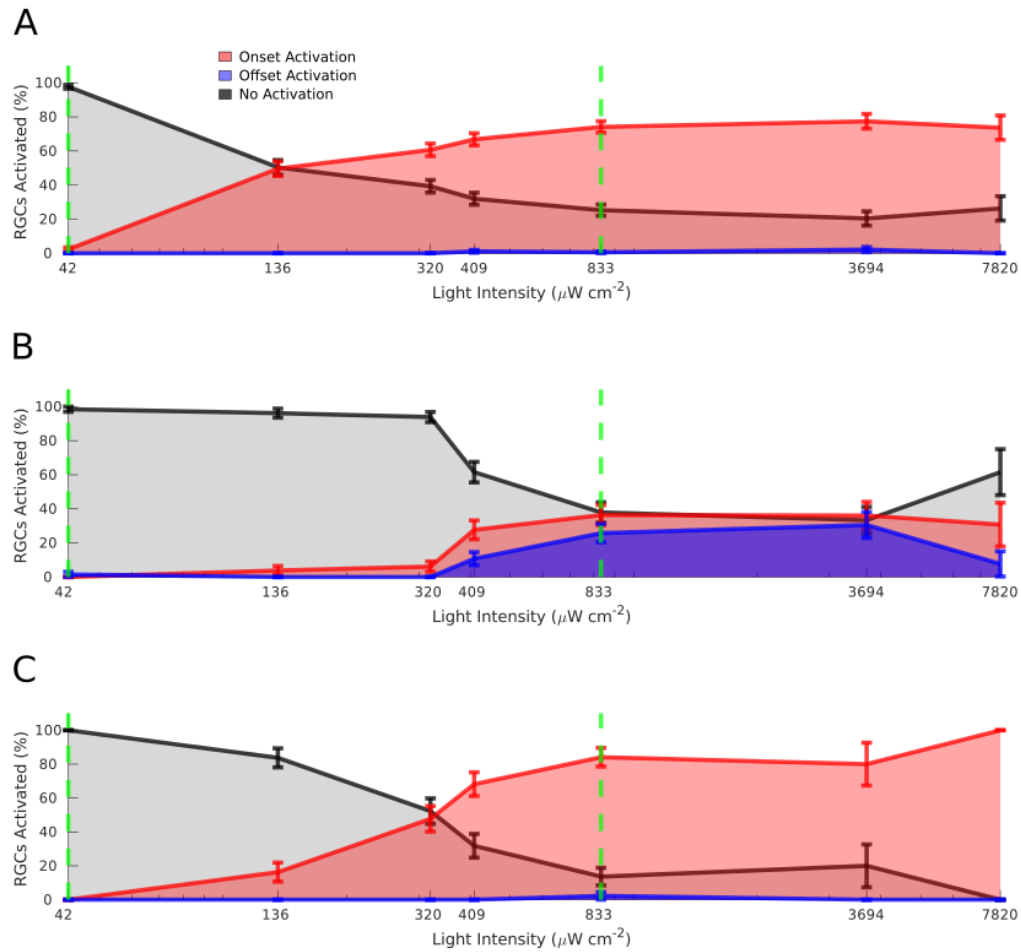

**Figure S2: The optogenetic activation of RGCs (mediated by ReaChR-expressing All amacrine cells) varies with the stimulus light intensity.**

**A.** Activation of ON RGCs with optogenetic stimulation (mediated by ReaChR-expressing All amacrine cells) at different light intensities. The X axis (logarithmic scale) represents the light intensity of the stimulus (a white flash). For each of seven luminance levels we show the percentage of RGCs that responded to the stimulation with ON (red), OFF (blue), and no responses (black). The two green dashed lines represent the two light levels - low intensity and high intensity, respectively - chosen for our study. **B.** Activation of OFF RGCs with optogenetic stimulation (mediated by ReaChR-expressing All amacrine cells) at different light intensities. Same plot as in A. **C.** Activation of ON-OFF RGCs with optogenetic stimulation (mediated by ReaChR-expressing All amacrine cells) at different light intensities. Same plot as in A.

***Video S1: GFP expression in the retina under the control of the HKamac promoter.***

Z-stack showing the GFP expression in the retina under the control of the HKamac promoter.

Note that, in this z-stack, the laser power was adapted at each z to maximize the signal.

**Table S1:** HKamac regulatory sequence details preceding transgene sequences.

GGTACCGGCCCAGGCTTCCCAGCAGGGCTAAGGATATGCAAGGAGTGCATTCATCCGGAGGTGTT  
GGCAGCATCCCAGCCCCACCCATTCTCATCGTAAATCAGGCTCACTTCCATTGGCTGCATACGGT  
GGAGTGATGTGACCATATGTCACCTTGAGCATTACACAAATCCTAATGAGCTAAAAATATGTTTGTTTTA  
GCTAATTGACCTCTTTGGCCACTAGTGTTGCTAGCGTGCATCCTATCCTTCCGTCAGAAGCCAGCA  
GATCATTTCCCTAGTTATAGAAACATTTGAGTCTTTACCCCTTGCCATATTGACAAAGCTCTTAATTGG  
CTTGACCTATCACATTGCTAGATATAAAGGCTACAATCCCTAGACTAAGAAGTAGGTCTCCAGTTGAA  
GTAGGGAGTCTCAGTCAATGTAGGCAGAGTACAAGACCCTACAGCCTGCTCTCTCACCTGCCATCG  
TACAGACCAGCTTTTAGGGGAGCCAAGTTGGGATACTCAATCCGGATCCGTAAGTTTAGTCTTTTTG  
TCTTTTATTTAGGTCCCGGATCCGGTGGTGGTGCAAATCAAAGAACTGCTCCTCAGTGGATGTTG  
CCTTTACTTCTAGACCGGT

Sequences highlighted:

IRPB enhancer, GNAT2 enhancer, SV40 SD/SA, Restriction enzymes sites inserted for cloning purposes (underlined)

**Table S2: Sequence of cloning vector containing HKamac-eGFP AAV sequences**

TTGCTCACATGTCCTGCAGGCAGCTGCGCGCTCGCTCGCTCACTGAGGCCGCCCGGGCGTCGGGCGACCTTTGGTCGCCCCGGC  
CTCAGTGAGCGAGCGAGCGCGCAGAGAGGGAGTGGCCAACCTCCATCACTAGGGGTTCTGCGGCCGCACGCGTCGTGGTACCG  
GCCCAGGCTTCCCAGCAGGGCTAAGGATATGCAAGGAGTGCATTCATCCGAGGTGTTGGCAGCATCCCAGCCCCACCCATT  
CTCATCGTAAATCAGGCTCACTTCCATTGGCTGCATACGGTGGAGTGATGTGACCATATGTCACTTGAGCATTACACAAATCC  
TAATGAGCTAAAAATATGTTTGTGTTTGTAGTAATTGACCTCTTTGGCCACTAGTGTGTAAGCGTGCATCTATCTTCCGTCA  
GAACCCAGCAGATCATTTCCCTAGTTATAGAAACATTTGAGTCTTTACCCTTGCCATATTGACAAAGCTCTTAATTGGCTTG  
ACCTATCACATTGCTAGATATAAAGGCTACAATCCCTAGACTAAGAAGTAGGTCTCCAGTTGAAGTAGGGAGTCTCAGTCAAT  
GTAGGCAGAGTACAAGACCCTACAGCCTGCTCTCTCACCTGCCATCGTACAGACCAGCTTTTAGGGGAGCCAAGTTGGGATAC  
TCAATCCGGATCCGTAAGTTTGTCTTTTTGTCTTTTTATTTTCCAGGTCCCGGATCCGGTGGTGGTCAAATCAAAGAAGTGCCTC  
CTCAGTGGATGTTGCCTTTACTTCTAGACCGTCCGACCATGGTGAAGCAAGGGCGAGGAGCTGTTACCCGGGGTGGTGCCCA  
TCCTGGTTCGAGCTGGACGGCGACGTAACGGCCACAAGTTCAGCGTGTCCGGCGAGGGCGAGGGCGATGCCACCTACGGCAAG  
CTGACCCTGAAGTTCATCTGCACCACCGGCAAGCTGCCGTGCCCTGGCCACCCCTCGTGACCACCCTGACCTACGGCGTGCA  
GTGCTTCAGCCGCTACCCCGACCACATGAAGCAGCAGACTTCTTCAAGTCCGCCATGCCGAAGGCTACGTCCAGGAGCGCA  
CCATCTTCTTCAAGGACGACGGCAACTACAAGACCCGCGCGAGGTGAAGTTCGAGGGCGACACCCTGGTGAACCGCATCGAG  
CTGAAGGGCATCGACTTCAAGGAGGACGGCAACATCTGGGGCACAAGCTGGAGTACAACACAACAGCCACAACGTCTATAT  
CATGGCCGACAAGCAGAAGAACGGCATCAAGGTGAAGTTCAGATCCGCCACAACATCGAGGACGGCAGCGTGCAGCTCGCCG  
ACCACTACCAGCAGAACACCCCATCGGCGACGGCCCGTGTGCTGCCGACAACCACTACCTGAGCACCCAGTCCGCCCTG  
AGCAAAGACCCCAACGAGAAGCGCGATCATATGGTCTGCTGGAGTTCGTGACCGCCCGGGGATCACTCTCGGCATGGACGA  
GCTGTACAAGTAAAGCGAAGCTTGCCCTCGAGCAGCGTGTCTGAGAGATCTACGGGTGGCATCCCTGTGACCCCTCCCAAGT  
CCTCTCTGCCCCTGGAAGTTGCCACTCCAGTGCCACCAGCCTTGCTCTAATAAAAATTAAGTTGCATCATTTTTGTCTGACTA  
GGTGTCTTCTATAATATTATGGGGTGGAGGGGGTGGTATGGAGCAAGGGCAAGTTGGGAAGACAACCTGTAGGGCTGCG  
GGGTCTATTGGGAACCAAGCTGGAGTGCAGTGGCACAATCTTGGCTCACTGCAATCTCCGCTCCTGGTTCAAGCGATTCTC  
CTGCCTCAGCTCCCGAGTTGTTGGGATTCCAGGCATGCATGACCAGGCTCAGCTAATTTTTGTTTTTTGGTAGAGACGGGG  
TTTACCATATTGGCCAGGCTGGTCTCCAACCTCAATCTCAGGTGATCTACCCACCTTGGCCTCCCAAATTGCTGGGATTAC  
AGCGTGAAACCACTGCTCCCTTCCCTGTCTTCTGATTTTGTAGGTAACCACGTGCGGACCGAGCGGCCGAGGAACCCCTAG  
TGATGGAGTTGGCCACTCCCTCTCTGCGCGCTCGCTCGCTCACTGAGGCCGGGCGACCAAAGGTGCGCCGACGCCCCGGCTTT  
GCCCGGGCGGCTCAGTGAGCGAGCGAGCGCGCAGTGCCTGCAGGGGCGCCTGATGCGGTATTTTTCTCCTTACGCATCTGTG  
CGGTATTTACACCCGCATACGTCAAAGCAACCATAGTACGCGCCCTGTAGCGGCGCATTAAAGCGCGGGGTGTGGTGGTTAC  
GCGCAGCGTGACCGCTACACTTGCCAGCGCCCTAGCGCCGCTCCTTTGCTTTCTTCCCTTCTTTCTCGCCACGTTCCCG  
GCTTTCCCGTCAAGCTCTAAATCGGGGGCTCCCTTAGGGTTCCGATTTAGTGCTTTACGGCACCTCGACCCAAAAAAGT  
GATTTGGGTGATGGTTACGTAGTGGCCATCGCCCTGATAGACGGTTTTTTCGCCCTTGACGTTGGAGTCCAGTCTTTTAA  
TAGTGGACTCTTGTCCAAACTGGAACAACACTCAACCCTATCTCGGGCTATTCTTTGATTTATAAGGGATTTTCCGATTT  
CGGCTATTGGTAAAAAATGAGCTGATTTAACAATAATTAACGCGAATTTTAAACAAATATTAACGTTTACAATTTTATGG  
TGACTCTCAGTACAATCTGCTCTGATGCCGCATAGTTAAGCCAGCCCCGACACCCGCCAACACCCGCTGACGCGCCCTGACG  
GGCTTGCTGCTCCCGCATCCGTTACAGACAAGCTGTGACCGTCTCCGGGAGCTGCATGTGTGAGAGTTTTACCCTCAT  
CACCGAAACGCGGAGACGAAAGGGCTCGTGATACGCTATTTTTATAGGTTAATGTCATGATAAATGGTTTTCTTAGACG  
TCAGGTGGCACTTTTCGGGAAATGTGCGCGGAACCCCTATTTGTTATTTTTCTAAATACATTCAAATATGTATCCGCTCAT  
GAGACAATAACCCTGATAAATGCTTCAATAATATTGAAAAAGGAAGATGAGTATTCAACATTTCCGTGTCGCCCTTATTC  
CCTTTTTTTCGGCATTGCTTCCCTGTTTTGCTCACCCAGAAACGCTGGTGAAGTAAAAGATGCTGAAGATCAGTTGGGT  
GCACGAGTGGGTACATCGAAGTGGATCTCAACAGCGGTAAGATCCTTGAGAGTTTTCGCCCCGAAGAAGCTTTTCCAATGAT  
GAGCACTTTTAAAGTCTGCTATGTGGCGCGGATTTATCCCGTATTGACGCCGGGCAAGAGCAACTCGGTGCGCGCATACACT  
ATTCTCAGAATGACTTGGTTGAGTACTCACAGTACAGAAAAGCATCTTACGGATGGCATGACAGTAAAGAGAATTATGCAGT  
GCTGCCATAACCATGAGTGATAAAGTGCAGGCAACTTACTTCTGACAACGATCGGAGACCGAAGGAGCTAACCGCTTTTTT  
GCACAACATGGGGATCATGTAAGTGCCTTGTGTTGGGAACCGGAGCTGAATGAAGCCATACCAAACGACGAGCGTGACA  
CCACGATGCCTGTAGCAATGGCAACAACGTTGCGCAAACTATTAAGTGGCGAACTACTTACTCTAGCTTCCCGGCAACAATTA  
ATAGACTGGATGGAGCGGATAAAGTTGCAGGACCACTTCTGCGCTCGGCCCTCCGGCTGGTGGTTATTGCTGATAAATC  
TGGAGCCGGTGGAGCGTGGGTCTCGCGGTATCATTGCAGCACTGGGGCCAGATGGTAAGCCCTCCCGTATCGTAGTTATCTACA

CGACGGGGAGTCAGGCAACTATGGATGAACGAAATAGACAGATCGCTGAGATAGGTGCCTCACTGATTAAGCATTGGTAACTG  
TCAGACCAAGTTTACTCATATATACTTTAGATTGATTTAAACTTCATTTTTAATTTAAAAGGATCTAGGTGAAGATCCTTTT  
TGATAATCTCATGACCAAAATCCCTTAACGTGAGTTTTCGTTCCACTGAGCGTCAGACCCCGTAGAAAAGATCAAAGGATCTT  
CTTGAGATCCTTTTTTCTGCGCGTAATCTGCTGCTTGCAAACAAAAAACACCGCTACCAGCGGTGTTTGTGGCCGGAT  
CAAGAGCTACCAACTCTTTTTCCGAAGGTAAGTGGCTTCAGCAGAGCGCAGATACCAAATACTGTCCTTCTAGTGTAGCCGTA  
GTTAGGCCACCACTTCAAGAACTCTGTAGCACCGCCTACATACCTCGCTCTGCTAATCCTGTTACCAGTGGCTGCTGCCAGTG  
GCGATAAGTCGTGTCTTACCGGGTTGGACTCAAGACGATAGTTACCGGATAAGGCGCAGCGGTGCGGGCTGAACGGGGGTTTCG  
TGCACACAGCCCAGCTTGGAGCGAACGACCTACACCGAACTGAGATACCTACAGCGTGAGCTATGAGAAAGCGCCACGCTTCC  
CGAAGGGAGAAAGGCGGACAGGTATCCGGTAAGCGGCAGGGTCGGAACAGGAGCGCACGAGGGAGCTTCCAGGGGGAAACG  
CCTGGTATCTTTATAGTCCTGTCGGGTTTCGCCACCTCTGACTTGAGCGTCGATTTTTGTGATGCTCGTCAGGGGGCGGAGC  
CTATGGAAAACGCCAGCAACGCGGCCTTTTTACGGTTCCTGGCCTTTTGTGGCCTT

**Table S3: Sequence of cloning vector containing HKamac-ReachR-TS-eYFP-ER-WPRE**

**AAV sequences**

TTGCTCACATGTCCTGCAGGCAGCTGCGCGCTCGCTCGCTCACTGAGGCCGCCGGGCGTCGGGCGACCTTTGGTCGCCC  
GGCCTCAGTGAGCGAGCGAGCGCGCAGAGAGGGAGTGGCCAACTCCATCACTAGGGGTTCTGCGGCCGCACGCGTCGTG  
GTACCGGCCAGGCTTCCAGCAGGGCTAAGGATATGCAAGGAGTGCATTTCATCCGGAGGTGTTGGCAGCATCCCAGCCC  
CACCCATTCTCATCGTAAATCAGGCTCACTTCCATTGGCTGCATACGGTGGAGTGATGTGACCATATGTCACTTGAGCA  
TTACACAAATCCTAATGAGCTAAAAATATGTTTGTGTTTGTAGCTAATTGACCTCTTTGGCCACTAGTGTGCTAGCGTGCAT  
CCTATCCTTCCGTGAGAACCCAGCAGATCATTTCCTAGTTATAGAAACATTTGAGTCTTTACCCCTTGCCATATTGACA  
AAGCTCTTAATTGGCTTGACCTATCACATTGCTAGATATAAAGGCTACAATCCCTAGACTAAGAAGTAGGTCTCCAGTTG  
AAGTAGGGAGTCTCAGTCAATGTAGGCAGAGTACAAGACCCTACAGCCTGCTCTCTCACCTGCCATCGTACAGACCAGCT  
TTTAGGGGAGCCAAGTTGGGATACTCAATCCGGATCCGTAAGTTTAGTCTTTTTGTCTTTTATTTAGGTTCCCGATCCG  
GTGGTGGTGAAATCAAAGAAGTCTCCTCAGTGGATGTTGCCTTACTTCTAGAggttagtgaaccgtcagatccgct  
agccaccATGGTGAGCAGAAGACCCTGGCTGCTGGCCCTGGCCCTGGCCCTGGCCCTGGCCGCGGCGAGCGCCGGCGCCA  
GCACCGGCAGCGACGCCACCGTGGCCGTGGCCACCCAGGACGGCCCCGACTACGTGTTCCACAGAGCCCACGAGAGAATG  
CTGTTCCAGACCAGCTACACCCTGGAGAACAACGGCAGCGTGATCTGCATCCCCAACACGGCCAGTGTCTGCTGGC  
CTGGCTGAAGAGTAACGGCACCAACGCCGAGAAGCTGGCCGCAACATCCTGCAGTGGGTGGTGTGCTGGCTGAGCGTGG  
CGTGCCTGGGCTGGTATGCGTATCAGCGCTGGCGCGGACCTGCGGCTGGGAAGAAGTGTATGTGGCGCTGATTGAAATG  
ATGAAAAGCATTATTGAAGCGTTTCATGAATTTGATAGCCCGGCGACCCTGTGGCTGAGCAGCGGCAACGGCGTGGTGTG  
GATGCGCTATGGCGAATGGCTGCTGACCTGCCCGTGATTCTGATTCATCTGAGCAACCTGACCGGCCGTGAAAGATGATT  
ATAGCAAACGCACCATGGGCCTGCTGGTGAGCGACGTGGGCTGCATTGTGTGGGGCGCGACCAGCGCGATGTGCACCGGC  
TGGACAAAATTCTGTTTTTCTGATTAGCCTGAGCTATGGCATGTATACCTATTTTCATGCGGCCAAAGTGTATATTGA  
AGCGTTTCATACCGTGCCGAAAGGCCGTGTCAGACAGCTGGTGAGAGCCATGGCCTGGCTGTTCTTCGTGAGCTGGGGCA  
TGTTCCCGTGCTGTTCTGCTGGGCCCGAGGGCTTCGGCCATATTAGCCCGTATGGCAGCGCGATTGGCCATAGCATT  
CTGGATCTGATTGCGAAGAACATGTGGGGCGTGTGGGCAACTATCTGCGCGTGAATAATTCATGAACATATTCTGCTGTA  
TGGCGATATTGCAAAAAACAGAAAATTACCATTGCGGGCCAGGAAATGGAAGTGGAAACCCTGGTGGCGGAAGAAGAAG  
ATAAGTACGAGAGCAGCccgggcccaagagcaggatcaccagcgagggcgagtagacatccccctggaccagatcgacatc  
aacgtggtgagcaaggcgaggagctgttcaccggggtggtgcccacctcctggctcagctggacggcgacgtaaaccggcca  
caagttagcgtgtccggcgagggcgagggcgatgccacctacggcaagctgacctgaagttcatctgcaccaccggca  
agctgccgtgccctggcccaccctcgtgaccacctcggctacggcctgcagtgcttcgcccgctaccggaccacatg  
aagcagcagcactcttcaagtccgcatgcccgaaggctacgtccaggagcgcaccatcttcttcaaggacgacggcaa  
ctacaagaccgcccggagggtgaagttcagggcgacaccctggtgaaccgcatcgagctgaagggtcagacttcaagg  
aggacggcaacatcctggggcacaagctggagtagaactacaacagccacaacgtctatatcatggccgacaagcagaag  
aacggcatcaaggtgaacttcaagatccgcccacaacatcgaggacggcagcgtgcagctcggcgaccactaccagcagaa  
caccatcggcgacggcccgtgctgctgcccgaaccactaccctgagctaccagtcggcctgagcaagacccca  
acgagaagcgcgatcacatggtcctgctggagttcgtgaccgcccgggatcactctcgcatggacgagctgtacaag  
ttctgctacgagaacgaggtgtaatgagaattcgatatcaagcttatcgataatcaacctctggattacaaaatttgta  
aagattgactggtattcttaactatgttgccttttacgctatgtggatacgtgctttaaagcctttgtatcatgcta  
ttgcttcccgtatggctttcattttctcctccttgataaaatcctggttgccttctttatgaggagttgtggcccgtt  
gtcaggcaacgtggcgtggtgtgactgtgtttgtgacgcaacccccactggttggggcattgccaccacctgtcagct  
cctttccgggactttcgtttccccctccctattggccaggggaactcctcggcctgccttggccgctgctggacag  
gggctcggctgttgggactgacaattccgtggtgttgcgggaaatcctcgtcctttccttggctgctgcctgtgtt  
gccacctggattctgcgcccggacgtccttctgctacgtccctcggccctcaatccagcggacctccttcccggccct  
gctgcccgtctgcggcctcttccgctcttccgcttccgctcagacgagtcggatcctccttggggcgcctccccgc  
atcgataaccgTCGAGAGATCTACGGGTGGCATCCCTGTGACCCCTCCCAGTGCCTCTCCTGGCCCTGGAAGTTGCCACT  
CCAGTGCCACCAGCCTTGTCTAATAAAAATTAAGTTGCATCATTTTGTCTGACTAGGTGTCCTTCTATAATATTATGGG  
GTGGAGGGGGTGGTATGAGGCAAGGGGCAAGTTGGGAAGACAACCTGTAGGGCTGCGGGGTCTATTGGGAACCAAGCT  
GGAGTGCAGTGGCACAATCTTGGCTCACTGCAATCTCCGCCTCCTGGGTTCAAGCGATTCTCCTGCCTCAGCCTCCGAG



TTGTTGGGATTCCAGGCATGCATGACCAGGCTCAGCTAATTTTTGTTTTTTGGTAGAGACGGGGTTTCACCATATTGGC  
CAGGCTGGTCTCCAACCTAATCTCAGGTGATCTACCCACCTTGGCCTCCCAAATTGCTGGGATTACAGGCGTGAACCA  
CTGCTCCCTTCCCTGTCTTCTGATTTTGTAGGTAACCACGTGCGGACCGAGCGGCCGAGGAACCCCTAGTGATGGAGT  
TGGCCACTCCCTCTCTGCGCGCTCGCTCGCTCACTGAGGCCGGGCGACCAAAGGTCGCCCCGACGCCCGGGCTTTGCCCGG  
GCGGCCTCAGTGAGCGAGCGAGCGCGCAGCTGCCTGCAGGGGCGCCTGATGCGGTATTTCTCCTTACGCATCTGTGCGG  
TATTTACACCCGCATACGTCAAAGCAACCATAGTACGCGCCCTGTAGCGGCGCATTAAAGCGGGCGGGTGTGGTGGTTAC  
GCGCAGCGTGACCGCTACACTTGCCAGCGCCCTAGCGCCCGCTCCTTTTCGCTTTCTTCCCTTCTTTCTCGCCACGTTCCG  
CCGGCTTTCCCGTCAAGCTCTAAATCGGGGGCTCCCTTTAGGGTTCGGATTTAGTGCTTTACGGCACCTCGACCCCAAA  
AACTTGATTTGGGTGATGGTTCACGTAGTGGGCCATCGCCTGATAGACGGTTTTTCGCCCTTTGACGTTGGAGTCCAC  
GTTCTTTAATAGTGGACTCTTGTTCAAAACCTGGAACAACACTCAACCCTATCTCGGGCTATTCTTTTGATTTATAAGGGA  
TTTTGCCGATTTGGCCTATTGGTTAAAAAATGAGCTGATTTAACAAAAATTTAACGGAATTTTAACAAAATATTAACG  
TTTACAATTTTATGGTGAAGTCTCAGTACAATCTGCTCTGATGCCGCATAGTTAAGCCAGCCCCGACACCCGCCAACACC  
CGCTGACGCGCCCTGACGGGCTTGTCTGCTCCCGGCATCCGCTTACAGACAAGCTGTGACCGTCTCCGGGAGCTGCATGT  
GTCAGAGTTTTACCCGTCATACCCGAAACGCGGAGACGAAAGGGCCTCGTGATACGCCATTTTTATAGGTTAATGTC  
ATGATAATAATGGTTTTCTTAGACGTCAGGTGGCACTTTTCGGGGAATGTGCGCGGAACCCCTATTTGTTATTTTTCTA  
AATACATTCAAATATGTATCCGCTCATGAGACAATAACCCTGATAAATGCTTCAATAATTTGAAAAAGGAAGAGTATGA  
GTATTCAACATTTCCGTGTGCGCCTTATTCCTTTTTTGGCGCATTTTGCCTTCTGTTTTTGTCAACCAGAAACGCTG  
GTGAAAGTAAAAGATGCTGAAGATCAGTTGGGTGCACGAGTGGGTTACATCGAACTGGATCTCAACAGCGGTAAGATCCT  
TGAGAGTTTTCGCCCCGAAGAACGTTTTCCAATGATGAGCACTTTTAAAGTTCTGCTATGTGGCGCGGTATTATCCCGTA  
TTGACGCCGGGCAAGAGCAACTCGGTGCGCGCATACACTATTCTCAGAATGACTTGGTTGAGTACTCACCAGTCACAGAA  
AAGCATCTTACGGATGGCATGACAGTAAGAGAATTATGCAAGTGTGCCATAACCATGAGTGATAACACTGCGGCCAATT  
ACTTCTGACAACGATCGGAGGACCGAAGGAGCTAACCGCTTTTTTGCACAACATGGGGGATCATGTAACCTCGCCTTGATC  
GTTGGGAACCGGAGCTGAATGAAGCCATACCAAACGACGAGCGTGACACCACGATGCCTGTAGCAATGGCAACAACGTTG  
CGCAAACATTAACGGCAACTACTTACTCTAGCTTCCCGGCAACAATTAATAGACTGGATGGAGGCGGATAAAGTTGC  
AGGACCCTTCTGCGCTCGGCCCTTCCGGCTGGCTGGTTTTATTGCTGATAAATCTGGAGCCGGTGAGCGTGGGTCTCGCG  
GTATCATTGCAGCACTGGGGCCAGATGGTAAGCCCTCCCGTATCGTAGTTATCTACACGACGGGGAGTCAGGCAACTATG  
GATGAACGAAATAGACAGATCGCTGAGATAGGTGCCCTCACTGATTAAGCATTGGTAACTGTCAGACCAAGTTTACTCATA  
TATACTTTAGATTGATTTAAAACCTCATTTTTAATTTAAAAGGATCTAGGTGAAGATCCTTTTTGATAATCTCATGACCA  
AAATCCCTTAACGTGAGTTTTCGTTCCACTGAGCGTCAGACCCCGTAGAAAAAGATCAAAGGATCTTCTTGAGATCCTTTT  
TTTCTGCGCGTAATCTGCTGCTTCAAACAAAAAACCACCGCTACCAGCGGTGGTTTTGTTTGC CGGATCAAGAGCTACC  
AACTCTTTTTCCGAAGGTAACCTGGCTTCAGCAGAGCGCAGATACCAAATACTGTCTTCTAGTGTAGCCGTAGTTAGGCC  
ACCACTTCAAGAACTCTGTAGCACC GCCTACATACCTCGCTCTGCTAATCCTGTTACCAGTGGCTGCTGCCAGTGGCGAT  
AAGTCGTGTCTTACCGGGTTGGACTCAAGACGATAGTTACCGGATAAGGCGCAGCGGTGCGGGCTGAACGGGGGTTCTGTG  
CACACAGCCCAGCTTGGAGCGAACGACCTACACCGAACTGAGATACCTACAGCGTGAGCTATGAGAAAGCGCCACGCTTC  
CCGAAGGGAGAAAGGCGGACAGGTATCCGGTAAGCGGCAGGGTCGGAACAGGAGAGCGCACGAGGGAGCTTCCAGGGGGA  
AACGCCTGGTATCTTTATAGTCTGTGCGGTTTTGCCACCTCTGACTTGAGCGTGCATTTTTGTGATGCTCGTCAGGGGG  
GCGGAGCCTATGAAAAACGCCAGCAACGCGGCCTTTTTACGGTTCCTGGCCTTTTGTGGCCTT

**Table S4: Sequence of cloning vector containing HKamac-GtACR1-TS-eYFP-ER-WPRE**

**AAV sequences**

TTGCTCACATGTCCTGCAGGCAGCTGCGCGCTCGCTCGCTCACTGAGCCGCCCGGGCGTCTGGGCGACCTTTGGTCGCCC  
GGCCTCAGTGAGCGAGCGAGCGCGCAGAGAGGGAGTGCCAACTCCATCACTAGGGGTTCTGCGGCCGACGCGTCGTG  
GTACCGGCCAGGCTTCCCAGCAGGGCTAAGGATATGCAAGGAGTGCAATTCATCCGGAGGTGTTGGCAGCATCCCAGCCC  
CACCCATTCTCATCGTAAATCAGGCTCACTTCCATTGGCTGCATACGGTGGAGTGATGTGACCATATGCACTTGAGCA  
TTACACAAATCCTAATGAGCTAAAAATATGTTTGTGTTTGTAGCTAATTGACCTCTTTGGCCACTAGTGTGCTAGCGTGCAT  
CCTATCCTTCCGTGAGAACCCAGCAGATCATTTCCCTAGTTATAGAAACATTTGAGTCTTTACCCCTTGCCATATTGACA  
AAGCTCTTAATTGGCTTGACCTATCACATTGCTAGATATAAAGGCTACAATCCCTAGACTAAGAAGTAGGTCTCCAGTTG  
AAGTAGGGAGTCTCAGTCAATGTAGGCAGAGTACAAGACCCTACAGCCTGCTCTCTCACCTGCCATCGTACAGACCAGCT  
TTTAGGGGAGCCAAGTTGGGATACTCAATCCGGATCCGTAAGTTTAGTCTTTTTGTCTTTTTATTTAGGTCCCAGGATCCG  
GTGGTGGTGAAATCAAAGAAGTCTCCTCAGTGGATGTTGCCTTTACTTCTAGAggttttagtgaaccgtcagatccgct  
agccaccatgagcagcattacttgtgaccagccatctatggagagtggagcagagagaaccagttttgcgtcgaaaaga  
gcctgattaccctggacggcatcaagtacgtgcagctggctcatggccgtggtagcgcctgccaggtgttctttatggct  
actagggcaccacaagtgccttgggagggcatctacctgccaaccacagaaatgatcacctattcactggctttcacagg  
caacggatacattcgagtggcaaatgggaagtatctgccttgggctagaatggcaagtggctgtgcacatgtccaatca  
tgctgggcttggtagcaacatggccctggtagaagtaacaatccattccactgaatcccatgatgattgccgcagcagc  
atctgcacagtgttcggaatcactgcctccgtggctcctggacccctgcacgtgtggctgtactgtttcatctctagat  
ttctttatctttgagatggtaggtgcattcgccattttggccatcactattcatgattttcagaccatcggaagtcca  
tgtactgaaggtggctgaaaggctgaaactgatgagaatcgtgttctacgtgagctggatggcctatcctatcctgtgg  
agttttcaagcacaggggcttgcattatgtctgagaacacttccctctgtgctgtacctgctgggagcagcactgtgcaa  
aaatacctatggaatcctgctgtgggctactacctgggactgctgaaaggcaagtgggaccgagattacgtgaaaggac  
gcaatgtcgatgggacactgatgcccgaatatgaacaggatctggagaaaggcaatactgaacgatatgaggatgctcgg  
gctggggaaaccggaccgggtgcccggcccaagagcaggatcaccagcaggggagtagacatccccctggaccagatcga  
catcaacgtggtagcaaggcgaggagctgttccaccggggtggtagccatcctggctgagctggacggcgacgtaaacg  
gccacaagttcagcgtgtccggcgaggcgaggggcagatgccacctacggcaagctgacctgaagttcatctgcaccacc  
ggcaagctgcccgtgccctggcccaccctcgtgaccacctcggctacggcctgcagtgcttcgcccgtacccccgacca  
catgaagcagcagcacttcttaagtcggccatgcccgaaggctacgtccaggagcgcaccatcttcttcaaggacgagc  
gcaactacaagaccgcgcccagggtgaagttcgagggcgacaccctggtagaacgcacgagctgaagggcatcgacttc  
aaggaggacggcaacatcctggggcacaagctggagtagaactacaacagccacaacgtctatatcatggccgacaagca  
gaagaacggcatcaaggtgaacttcaagatccgccacaacatcgaggacggcagcgtgcagctcgccgaccactaccagc  
agaacacccccatcgcgacggccccgtgctgctgcccgacaaccactacctgagctaccagtcgcccctgagcaagac  
ccaacgagaagcgcgatcacatggtcctgctggagttcgtgaccgcccgggacactctcggcatggacgagctgta  
caagttctgctacgagaacgaggtgtaatgagaattcgatatcaagcttatcgataatcaacctctggattacaaaattt  
gtgaaagattgactggtattcttaactatggtgctccttttacgctatgtggatacgtgctttaatgcctttgtatcat  
gctattgcttcccgtatggctttcattttctcctcctgtataaatcctggttgctgtctctttatgaggagttgtggcc  
cgttgcaggaacgtggcgtgggtgctgactgtgtttgctgacgcaacccccactggttggggcattgccaccacctgtc  
agctcctttccgggactttcgttttccccctccctattgccacggcggaactcatcgccgctgcttgcccgtgctgg  
acaggggctcggctgttgggactgacaattcgtgggtgtgtcgggaaatcatcgtcctttccttggctgctgcctg  
tgttgcacctgattctgcgcccagcgtccttctgctacgtccctcggccctcaatccagcggaccttccctcccgcg  
gcctgctgcccgtctgcggcctcttccgctcttccgctctcgcctcagacgagtcggatctccctttgggcccctcc  
ccgcatcgataccgTCGAGAGATCTACGGGTGGCATCCCTGTGACCCCTCCCAGTGCCTCTCCTGGCCCTGGAAGTTGC  
CACTCCAGTGCCCACCAGCCTTGTCTAATAAAATTAAGTTGCATCATTTTTGTCTGACTAGGTGTCTTCTATAATATTA  
TGGGTGGAGGGGGGTGGTATGGAGCAAGGGGCAAGTTGGGAAGACAACCTGTAGGGCTGCGGGGTCTATTGGGAACCA  
AGCTGGAGTGCAGTGGACAATCTTGCTCACTGCAATCTCCGCCTCCTGGGTTCAAGCGATTCTCCTGCCTCAGCCTCC  
CGAGTTGTTGGGATCCAGGCATGCATGACCAGGCTCAGCTAATTTTTGTTTTTTGGTAGAGACGGGGTTTCACCATAT  
TGGCCAGGCTGGTCTCCAACCTCCTAATCTCAGGTGATCTACCCACCTTGGCCTCCCAAATTGCTGGGATTACAGGCGTGA

ACCACTGCTCCCTTCCCTGTCTTCTGATTTTGTAGGTAACCACGTGCGGACCGAGCGGCCGAGGAACCCCTAGTGATG  
GAGTTGGCCACTCCCTCTCTGCGCGCTCGCTCGCTCACTGAGGCCGGGCGACCAAAGGTGCCCCGACGCCCGGGCTTTGC  
CCGGGCGGCCTCAGTGAGCGAGCGAGCGCGCAGCTGCCTGCAGGGGCGCCTGATGCGGTATTTTCTCCTTACGCATCTGT  
GCGGTATTTACACCCGCATACGTCAAAGCAACCATAGTACGCGCCCTGTAGCGGCGCATTAAAGCGCGGCGGGTGTGGTGG  
TTACGCGCAGCGTGACCGCTACACTTGCCAGCGCCCTAGCGCCCGCTCCTTTTCGCTTTCTTCCCTTCCCTTTCTCGCCACG  
TTCGCCGGCTTTCCCGTCAAGCTCTAAATCGGGGGCTCCCTTTAGGGTTCCGATTTAGTGCTTTACGGCACCTCGACCC  
CAAAAACTTGATTTGGGTGATGGTTCACGTAGTGGGCCATCGCCCTGATAGACGGTTTTTTCGCCCTTTGACGTTGGAGT  
CCACGTTCTTTAATAGTGGACTCTTGTTCAAAACCTGGAACAACACTCAACCCTATCTCGGGCTATTCTTTTGATTTATAA  
GGGATTTTGCAGTTTCGGCCTATTGGTTAAAAAATGAGCTGATTTAACAAAAATTTAACGCGAATTTTAAACAAAATATT  
AACGTTTACAATTTTATGGTGCCTCTCAGTACAATCTGCTCTGATGCCGCATAGTTAAGCCAGCCCCGACACCCGCCAA  
CACCCGCTGACGCGCCCTGACGGGCTTGTCTGCTCCCGGCATCCGCTTACAGACAAGCTGTGACCGTCTCCGGGAGCTGC  
ATGTGTCAGAGGTTTTACCGTCATACCGAAACGCGGAGACGAAAGGCCTCGTGATACGCCTATTTTTATAGGTTAA  
TGTATGATAATAATGGTTTTCTTAGACGTCAGGTGGCACTTTTCGGGAAATGTGCGCGGAACCCCTATTTGTTATTTT  
TCTAAATACATTCAAATATGTATCCGCTCATGAGACAAATAACCCTGATAAATGCTTCAATAATGAAAAAGGAAGAGT  
ATGAGTATTTCAACATTTCCGTGTGCGCCTTATTCCTTTTTTTCGGGCATTTTGCCTTCCTGTTTTTGTCTACCCAGAAAC  
GCTGGTGAAGTAAAAGATGCTGAAGATCAGTTGGGTGCACGAGTGGGTACATCGAACTGGATCTCAACAGCGGTAAGA  
TCCTTGAGAGTTTTCGCCCCGAAGAACGTTTTCCAATGATGAGCACTTTTAAAGTTCTGCTATGTGGCGCGGTATTATCC  
CGTATTGACGCCGGGCAAGAGCAACTCGGTGCGCGCATACACTATTCTCAGAATGACTTGTTGAGTACTCACCAGTCAC  
AGAAAAGCATCTTACGGATGGCATGACAGTAAGAGAATTATGCAGTGTGCCATAACCATGAGTGATAAACTGCGGCCA  
ACTTACTTCTGACAACGATCGGAGGACCGAAGGAGCTAACCCTTTTTTGCACAACATGGGGGATCATGTAACCTCGCCTT  
GATCGTTGGGAACCGGAGCTGAATGAAGCCATACCAAACGACGAGCGTGACACCACGATGCCTGTAGCAATGGCAACAAC  
GTTGCGCAAACCTATTAACCTGGCGAACTACTTACTCTAGCTTCCCGGCAACAATTAATAGACTGGATGGAGGCGGATAAAG  
TTGCAGGACCACTTCTGCGCTCGGCCCTTCCGGCTGGCTGGTTTTATTGCTGATAAATCTGGAGCCGGTGAGCGTGGGTCT  
CGCGGTATCATTGCAGCACTGGGGCCAGATGGTAAGCCCTCCCGTATCGTAGTTATCTACACGACGGGGAGTCAGGCAAC  
TATGGATGAACGAAATAGACAGATCGCTGAGATAGGTGCCTCACTGATTAAGCATTGGTAACTGTCAGACCAAGTTTACT  
CATATATACTTTAGATTGATTTAAAACCTCATTTTTAATTTAAAAGGATCTAGGTGAAGATCCTTTTTGATAATCTCATG  
ACCAAAATCCCTTAACGTGAGTTTTTCGTTCCACTGAGCGTCAGACCCCGTAGAAAAGATCAAAGGATCTTCTTGAGATCC  
TTTTTTTCTGCGCGTAATCTGCTGCTTGCAAACAAAAAACACCCGCTACCAGCGGTGGTTTTGTTTCCCGGATCAAGAGC  
TACCAACTCTTTTTCCGAAGGTAACCTGGCTTCAGCAGAGCGCAGATACCAAATACTGTCTTCTAGTGTAGCCGTAGTTA  
GGCCACCACTTCAAGAACTCTGTAGCACCGCCTACATACCTCGCTCTGCTAATCCTGTTACCAGTGGCTGCTGCCAGTGG  
CGATAAGTCGTGTCTTACCGGGTTGGACTCAAGACGATAGTTACCGGATAAGGCGCAGCGGTCCGGCTGAACGGGGGGTT  
CGTGACACAGCCCAGCTTGGAGCGAACGACCTACACCGAACTGAGATACCTACAGCGTGAGCTATGAGAAAGCGCCACG  
CTTCCCGAAGGGAGAAAGCGGACAGGTATCCGGTAAGCGGCAGGGTCGGAACAGGAGAGCGCACGAGGGAGCTTCCAGG  
GGGAAACGCCTGGTATCTTTATAGTCTGTGGGTTTTCGCCACCTCTGACTTGAGCGTCGATTTTTGTGATGCTCGTCAG  
GGGGGCGGAGCCTATGGAAAACGCCAGCAACGCGGCCCTTTTTACGGTTCCTGGCCTTTTGTGGCCTT
